# Supplementary material for: Reduced Ejection Fraction in Elite Endurance Athletes: Clinical and Genetic Overlap With Dilated Cardiomyopathy
Source: PubMed Central journal article supplement (PMC11062611; doi:10.1161/circulationaha.122.063777), 2023-12-18
Supplement: cir-149-1405-s001.pdf [file cir-149-1405-s001.pdf]

## **SUPPLEMENTAL MATERIAL**

### **TABLE CAPTIONS**

#### **Supplementary table 1 – Exercise cardiac magnetic resonance imaging characteristics**

The biventricular volumes and ejection fraction in response to exercise on a supine cycling exercise cardiac magnetic resonance imaging scan in elite endurance athletes with a reduced ejection fraction and a preserved ejection fraction from the Pro@Heart and ProAFHeart trials

#### **Supplementary Table 2 – ECG characteristics**

The electrocardiography characteristics of elite endurance athletes with a reduced ejection fraction and a preserved ejection fraction from the Pro@Heart and ProAFHeart trials

#### **Supplementary Table 3 - Univariate and multivariate association with a reduced EF**

Univariate and multivariate logistic regression analysis to assess the determinants of a reduced ejection fraction in elite endurance athletes from the Pro@Heart and ProAFHeart trials.

**Supplementary table 1 – Exercise cardiac magnetic resonance imaging characteristics**

|                                     | Reduced EF (n=14)  | Preserved EF (n=131) | p-value |
|-------------------------------------|--------------------|----------------------|---------|
| <b>Rest</b>                         |                    |                      |         |
| HR (bpm)                            | 57 ± 9             | 55 ± 8               | 0.475   |
| LVEDVi (mL/m <sup>2</sup> )         | 113 ± 29           | 114 ± 18             | 0.913   |
| LVESVi (mL/m <sup>2</sup> )         | 53 (46 – 71)       | 47 (40 – 52)         | 0.014   |
| LVSVi (mL/m <sup>2</sup> )          | 56 ± 14            | 67 ± 11              | 0.001   |
| LVEF (%)                            | 50 ± 3             | 59 ± 4               | <0.001  |
| RVEDVi (mL/m <sup>2</sup> )         | 133 (110 – 165)    | 126 (111 – 140)      | 0.235   |
| RVESVi (mL/m <sup>2</sup> )         | 77 (62 – 97)       | 60 (51 – 67)         | 0.001   |
| RVSVi (mL/m <sup>2</sup> )          | 61 (50 – 70)       | 65 (59 – 75)         | 0.037   |
| RVEF (%)                            | 43 ± 3             | 54 ± 5               | <0.001  |
| Average CI (L/min/m <sup>2</sup> )  | 3.3 (2.4 – 3.7)    | 3.5 (3.1 – 4.1)      | 0.091   |
| <b>Peak exercise</b>                |                    |                      |         |
| HR (bpm)                            | 151 (147 – 157)    | 151 (143 – 156)      | 0.343   |
| Power (W)                           | 195 (161 – 246)    | 186 (150 – 229)      | 0.455   |
| LVEDVi (mL/m <sup>2</sup> )         | 111 ± 25           | 110 ± 17             | 0.841   |
| LVESVi (mL/m <sup>2</sup> )         | 37 (29 – 44)       | 29 (24 – 35)         | 0.022   |
| LVSVi (mL/m <sup>2</sup> )          | 75 ± 17            | 80 ± 12              | 0.213   |
| LVEF (%)                            | 68 ± 3             | 73 ± 4               | <0.001  |
| RVEDVi (mL/m <sup>2</sup> )         | 133 (108 – 160)    | 119 (105 – 132)      | 0.115   |
| RVESVi (mL/m <sup>2</sup> )         | 51 (35 – 63)       | 37 (29 – 45)         | 0.005   |
| RVSVi (mL/m <sup>2</sup> )          | 79 ± 18            | 82 ± 13              | 0.486   |
| RVEF (%)                            | 62 ± 6             | 69 ± 5               | <0.001  |
| Average CI (L/min/m <sup>2</sup> )  | 11.4 (10.1 – 14.3) | 12 (10.5 – 13.4)     | 0.761   |
| <b>Delta (Peak – Rest)</b>          |                    |                      |         |
| ΔHR (bpm)                           | 95 (90 – 103)      | 94 (88 – 103)        | 0.825   |
| ΔLVSVi (mL/m <sup>2</sup> )         | 19 (15 – 24)       | 13 (9 – 17)          | 0.001   |
| ΔLVEF (%)                           | 18 ± 5             | 14 ± 4               | 0.001   |
| ΔLVEF <11% - n (%)                  | 1 (7.1)            | 22 (16.8)            | 0.699   |
| ΔRVSVi (mL/m <sup>2</sup> )         | 22 ± 6             | 15 ± 8               | 0.001   |
| ΔRVEF (%)                           | 19 ± 5             | 15 ± 5               | 0.005   |
| ΔRVEF <11% - n (%)                  | 1 (7.1)            | 21 (16)              | 0.695   |
| ΔAverage CI (L/min/m <sup>2</sup> ) | 8.0 (7.1 – 10.7)   | 8.3 (7.2 – 9.6)      | 0.731   |

HR: Heart rate - LVEDVi: Left ventricular end-diastolic volume indexed – LVESVi: Left ventricular end-systolic volume indexed – LVSVi: Left ventricular stroke volume indexed – LVEF: Left ventricular ejection fraction – LVMi: Left ventricular mass indexed – RVEDVi: Right ventricular end-diastolic volume indexed – RVESVi: Right ventricular end-systolic volume indexed – RVSVi: Right ventricular stroke volume indexed – RVEF: Right ventricular ejection fraction – CI: Cardiac index

**Supplementary Table 2 – ECG characteristics**

|                                   | Reduced EF (n=44) | Preserved EF (n=237) | p-value |
|-----------------------------------|-------------------|----------------------|---------|
| HR (bpm)                          | 55 (47 – 60)      | 52 (45 – 60)         | 0.438   |
| PR (ms)                           | 158 (137 – 174)   | 158 (141 – 180)      | 0.434   |
| 1 <sup>st</sup> degree HB – n (%) | 0 (0)             | 20 (8.4)             | 0.052   |
| Axis – n (%)                      |                   |                      |         |
| Normal                            | 30 (68.2)         | 178 (75.1)           | 0.293   |
| Right                             | 14 (31.8)         | 54 (22.8)            |         |
| Left                              | 0                 | 5 (2.1)              |         |
| QRS (ms)                          | 104 ± 8           | 99 ± 9               | 0.001   |
| BBB – n (%)                       |                   |                      |         |
| No                                | 25 (56.8)         | 155 (65.4)           | 0.551   |
| Incomplete right                  | 18 (41.9)         | 78 (32.9)            |         |
| Complete right                    | 1 (2.3)           | 4 (1.7)              |         |
| Left                              | 0 (0)             | 0 (0)                |         |
| TWI – n (%)                       | 6 (13.6)          | 23 (9.7)             | 0.431   |
| QTc (ms)                          | 394 (378 – 409)   | 398 (384 – 415)      | 0.139   |

HR: Heart rate, HB: heart block, BBB: bundle branch block, TWI: T-wave inversion

**Supplementary Table 3 - Univariate and multivariate association with a reduced EF**

|                                               | <b>Univariate logistic regression</b> | <b>Multivariate logistic regression</b> |
|-----------------------------------------------|---------------------------------------|-----------------------------------------|
| <i>Variable</i>                               | OR (95% CI)                           | OR (95% CI)                             |
| Age – per 1 year increase                     | 1.015 (0.979 – 1.052)                 |                                         |
| Sex – male vs female                          | 4.033 (1.201 – 13.536)                | 3.006 (0.601 – 15.032)                  |
| Weight – per 1kg increase                     | 1.018 (0.987 – 1.051)                 |                                         |
| Height – per 1cm increase                     | 1.041 (0.995 – 1.089)                 |                                         |
| BMI – per 1kg/m <sup>2</sup> increase         | 1.015 (0.883 – 1.167)                 |                                         |
| Systolic BP – per 1mmHg increase              | 1.018 (0.989 – 1.048)                 |                                         |
| Diastolic BP – per 1mmHg increase             | 1.035 (0.997 – 1.074)                 |                                         |
| Exercise – per 1h/week increase               | 1.071 (0.996 – 1.150)                 |                                         |
| VO <sub>2</sub> max – per 1mL/min/kg increase | 1.037 (0.997 – 1.079)                 |                                         |
| LVESVi-PRS – per 0.01 increase                | 1.028 (1.005 – 1.052)                 | 1.036 (1.011 – 1.061)                   |

OR: Odds-ratio – CI: Confidence Interval
